# Supplementary material
Source: MDPI journal article supplement (https://www.mdpi.com/1424-2818/16/5/291)
Supplement: s1 [file s1]

**Supplementary material to:**

**Interannual variation in the zooplankton community of the North Adriatic Sea under short term climatic anomalies**

**Samuele Menicucci<sup>1,2</sup>, Andrea De Felice<sup>1</sup>, Ilaria Biagiotti<sup>1</sup>, Giovanni Canduci<sup>1</sup>, Ilaria Costantini<sup>1</sup>, Antonio Palermينو<sup>1</sup>, Michele Centurelli<sup>1</sup>, Iole Leonori<sup>1\*</sup>**

<sup>1</sup> National Research Council (CNR), IRBIM-Institute for Marine Biological Resources and Biotechnology, Largo Fiera della Pesca, 2, 60125 Ancona, Italy;

<sup>2</sup> Alma Mater Studiorum, Università di Bologna, Via Zamboni, 33, 40126, Bologna, Italy.

\* Correspondence: iole.leonori@cnr.it.

**Table S1.** Results of univariate PERMANOVA main test and pairwise-test carried out separately on each environmental variable. The factors used are explained in Table 1. df= degrees of freedom; MS= mean square; Pseudo-F= statistic F; t= statistic t for pairwise comparisons.

| Temperature                                                  |       |         |          |         |
|--------------------------------------------------------------|-------|---------|----------|---------|
| MAIN TEST                                                    |       |         |          |         |
| Source                                                       | df    | MS      | Pseudo-F | P(perm) |
| Year                                                         | 1     | 0.007   | 1.040    | 0.355   |
| In-offshore                                                  | 1     | 0.198   | 31.487   | <0.001  |
| Subarea                                                      | 1     | 0.009   | 1.400    | 0.272   |
| YearxIn-offshore                                             | 1     | 0.006   | 0.874    | 0.393   |
| YearxSubarea                                                 | 1     | 0.035   | 5.541    | 0.032   |
|                                                              |       |         |          |         |
| PAIR-WISE TESTS                                              |       |         |          |         |
| Term 'YearXSubarea' for pairs of levels of factor 'Year'     |       |         |          |         |
| Within level 'North' of factor 'Subarea'                     |       |         |          |         |
| Groups                                                       | t     | P(perm) |          |         |
| 2019 <i>vs.</i> 2022                                         | 2.640 | 0.028   |          |         |
|                                                              |       |         |          |         |
| Within level 'South' of factor 'Subarea'                     |       |         |          |         |
| Groups                                                       | t     | P(perm) |          |         |
| 2019 <i>vs.</i> 2022                                         | 0.355 | 0.741   |          |         |
|                                                              |       |         |          |         |
| Salinity                                                     |       |         |          |         |
| MAIN TEST                                                    |       |         |          |         |
| Source                                                       | df    | MS      | Pseudo-F | P(perm) |
| Year                                                         | 1     | 4.778   | 27.753   | <0.001  |
| In-offshore                                                  | 1     | 8.729   | 50.702   | <0.001  |
| Subarea                                                      | 1     | 2.777   | 16.131   | 0.002   |
| YearxIn-offshore                                             | 1     | 1.923   | 11.171   | 0.006   |
| YearxSubarea                                                 | 1     | 0.055   | 0.319    | 0.580   |
|                                                              |       |         |          |         |
| PAIR-WISE TESTS                                              |       |         |          |         |
| Term 'YearxIn-offshore' for pairs of levels of factor 'Year' |       |         |          |         |
| Within level 'Inshore' of factor 'Inshore vs. offshore'      |       |         |          |         |
| Groups                                                       | t     | P(perm) |          |         |
| 2019 <i>vs.</i> 2022                                         | 4.936 | 0.006   |          |         |
|                                                              |       |         |          |         |
| Within level 'Offshore' of factor 'In-offshore'              |       |         |          |         |
| Groups                                                       | t     | P(perm) |          |         |
| 2019 <i>vs.</i> 2022                                         | 1.968 | 0.097   |          |         |
|                                                              |       |         |          |         |
| Fluorescence                                                 |       |         |          |         |

| MAIN TEST        |    |       |          |         |
|------------------|----|-------|----------|---------|
| Source           | df | MS    | Pseudo-F | P(perm) |
| Year             | 1  | 0.509 | 15.172   | 0.003   |
| In-offshore      | 1  | 0.367 | 10.950   | 0.007   |
| Subarea          | 1  | 0.240 | 7.153    | 0.019   |
| YearxIn-offshore | 1  | 0.211 | 6.287    | 0.024   |
| YearxSubarea     | 1  | 0.065 | 1.949    | 0.193   |

#### PAIR-WISE TESTS

Term 'YearxIn-offshore' for pairs of levels of factor 'Year'

Within level 'Inshore' of factor 'Inshore vs. offshore'

| Groups        | t     | P(perm) |
|---------------|-------|---------|
| 2019 vs. 2022 | 3.458 | 0.016   |

Within level 'Offshore' of factor 'In-offshore'

| Groups        | t     | P(perm) |
|---------------|-------|---------|
| 2019 vs. 2022 | 1.835 | 0.115   |

#### Oxygen saturation

| MAIN TEST        |    |        |          |         |
|------------------|----|--------|----------|---------|
| Source           | df | MS     | Pseudo-F | P(perm) |
| Year             | 1  | 10.299 | 1.680    | 0.225   |
| In-offshore      | 1  | 75.185 | 12.262   | 0.006   |
| Subarea          | 1  | 15.037 | 2.452    | 0.142   |
| YearxIn-offshore | 1  | 1.219  | 0.199    | 0.674   |
| YearxSubarea     | 1  | 23.882 | 3.895    | 0.071   |

**Table S2.** Results of univariate PERMANOVA main test and pairwise-test carried out on the values of total abundance, total biomass, species richness and H' index values obtained from the zooplankton analysis. The factors used are explained in Table 1. df=degrees of freedom; MS= mean square; Pseudo-F= statistic F; t=statistic t for pairwise comparisons.

| Total abundance  |    |       |          |         |
|------------------|----|-------|----------|---------|
| MAIN TEST        |    |       |          |         |
| Source           | df | MS    | Pseudo-F | P(perm) |
| Year             | 1  | 1.072 | 1.883    | 0.197   |
| In-offshore      | 1  | 2.072 | 3.641    | 0.080   |
| Subarea          | 1  | 3.749 | 6.589    | 0.024   |
| YearxIn-offshore | 1  | 0.002 | 0.004    | 0.955   |
| YearxSubarea     | 1  | 0.963 | 1.692    | 0.223   |

#### Total biomass

| MAIN TEST |    |    |          |         |
|-----------|----|----|----------|---------|
| Source    | df | MS | Pseudo-F | P(perm) |

|                  |   |       |       |       |
|------------------|---|-------|-------|-------|
| Year             | 1 | 0.013 | 0.012 | 0.922 |
| In-offshore      | 1 | 7.708 | 7.028 | 0.016 |
| Subarea          | 1 | 3.942 | 3.594 | 0.077 |
| YearxIn-offshore | 1 | 0.112 | 0.102 | 0.779 |
| YearxSubarea     | 1 | 0.198 | 0.181 | 0.705 |

---

### Species richness

---

#### MAIN TEST

| Source           | df | MS    | Pseudo-F | P(perm) |
|------------------|----|-------|----------|---------|
| Year             | 1  | 0.192 | 11.090   | 0.008   |
| In-offshore      | 1  | 0.366 | 21.177   | 0.001   |
| Subarea          | 1  | 0.021 | 1.198    | 0.297   |
| YearxIn-offshore | 1  | 0.002 | 0.105    | 0.758   |
| YearxSubarea     | 1  | 0.118 | 6.849    | 0.021   |

---

#### PAIR-WISE TESTS

---

Term 'YearXSubarea' for pairs of levels of factor 'Year'

Within level 'North' of factor 'Subarea'

| Groups        | t     | P(perm) |
|---------------|-------|---------|
| 2019 vs. 2022 | 0.593 | 0.565   |

Within level 'South' of factor 'Subarea'

| Groups        | t     | P(perm) |
|---------------|-------|---------|
| 2019 vs. 2022 | 3.518 | 0.045   |

---

### H' index

---

#### MAIN TEST

| Source           | df | MS    | Pseudo-F | P(perm) |
|------------------|----|-------|----------|---------|
| Year             | 1  | 0.024 | 0.519    | 0.504   |
| In-offshore      | 1  | 0.129 | 2.751    | 0.123   |
| Subarea          | 1  | 0.041 | 0.873    | 0.400   |
| YearxIn-offshore | 1  | 0.005 | 0.110    | 0.745   |
| YearxSubarea     | 1  | 0.232 | 4.930    | 0.039   |

---

#### PAIR-WISE TESTS

---

Term 'YearXSubarea' for pairs of levels of factor 'Year'

Within level 'North' of factor 'Subarea'

| Groups        | t     | P(perm) |
|---------------|-------|---------|
| 2019 vs. 2022 | 1.945 | 0.028   |

Within level 'South' of factor 'Subarea'

| Groups        | t     | P(perm) |
|---------------|-------|---------|
| 2019 vs. 2022 | 1.696 | 0.143   |

**Table S3.** Results of Multivariate PERMANOVA main test and pairwise-test performed on the matrix of relative abundance (individuals per m<sup>2</sup>) for all taxa identified during zooplankton analysis. The factors used are explained in Table 1. df= degrees of freedom; MS= mean square; Pseudo-F= statistic F; t= statistic t for pairwise comparisons.

| MAIN TEST        |    |          |          |         |
|------------------|----|----------|----------|---------|
| Source           | df | MS       | Pseudo-F | P(perm) |
| Year             | 1  | 1601.900 | 4.453    | <0.001  |
| In-offshore      | 1  | 3157.900 | 8.778    | <0.001  |
| Subarea          | 1  | 3232.800 | 8.986    | <0.001  |
| YearxIn-offshore | 1  | 636.820  | 1.770    | 0.070   |
| YearxSubarea     | 1  | 834.320  | 2.319    | 0.018   |

  

| PAIR-WISE TESTS                                          |       |         |
|----------------------------------------------------------|-------|---------|
| Term 'YearXSubarea' for pairs of levels of factor 'Year' |       |         |
| Within level 'North' of factor 'Subarea'                 |       |         |
| Groups                                                   | t     | P(perm) |
| 2019 vs. 2022                                            | 2.051 | 0.002   |

  

| Within level 'South' of factor 'Subarea' |       |         |
|------------------------------------------|-------|---------|
| Groups                                   | t     | P(perm) |
| 2019 vs. 2022                            | 1.613 | 0.029   |

**Table S4.** Output of SIMPER analysis conducted on the Bray Curtis resemblance matrix of relative abundance (individuals per m<sup>2</sup>) for all taxa identified during zooplankton analysis. Cut-off for low contribution at 50%. Av.Abund = average abundance; Av.Diss= average dissimilarity; Contrib %= percentage of variance explained by the explanatory variables; Cum. %= cumulative percentage of variance explained by the explanatory variables.

| Average dissimilarity = 40.00 |          |          |         |         |          |       |
|-------------------------------|----------|----------|---------|---------|----------|-------|
|                               | 2019     | 2022     |         |         |          |       |
| Species                       | Av.Abund | Av.Abund | Av.Diss | Diss/SD | Contrib% | Cum.% |
| <i>Noctiluca scintillans</i>  | 9.37     | 0        | 2.12    | 2.03    | 5.3      | 5.3   |
| <i>Pleopis polyphemoides</i>  | 5.89     | 3.2      | 1.04    | 1.27    | 2.59     | 7.89  |
| <i>Evadne nordmanni</i>       | 4.41     | 0        | 0.99    | 1.42    | 2.46     | 10.35 |
| <i>Doliolina muelleri</i>     | 6.24     | 4.72     | 0.96    | 1.41    | 2.4      | 12.75 |
| <i>Calanus helgolandicus</i>  | 4.02     | 4.84     | 0.88    | 1.29    | 2.21     | 14.96 |
| Clauso-Paracalanidae          | 2.7      | 3.59     | 0.87    | 1.1     | 2.17     | 17.13 |
| <i>Centropages ponticus</i>   | 3.59     | 4.33     | 0.83    | 1.26    | 2.07     | 19.2  |
| Ophiopluteus                  | 6.18     | 5.5      | 0.81    | 1.22    | 2.02     | 21.23 |
| <i>Penilia avirostris</i>     | 6.34     | 7.5      | 0.77    | 1.2     | 1.93     | 23.16 |
| <i>Pseudevadne tergestina</i> | 1.27     | 3.3      | 0.73    | 1.12    | 1.83     | 24.99 |
| <i>Calocalanus sp.</i>        | 3.56     | 0.9      | 0.72    | 1.21    | 1.79     | 26.78 |
| <i>Podon intermedius</i>      | 4        | 1.91     | 0.7     | 1.36    | 1.75     | 28.53 |
| Chaetognatha                  | 4.12     | 5.8      | 0.66    | 1.22    | 1.65     | 30.18 |
| <i>Muggiaea atlantica</i>     | 3.26     | 3.77     | 0.65    | 1.38    | 1.64     | 31.82 |
| <i>Temora longicornis</i>     | 2.31     | 3.17     | 0.65    | 1.27    | 1.61     | 33.43 |

|                               |      |      |      |      |      |       |
|-------------------------------|------|------|------|------|------|-------|
| Cirripedia (nauplius)         | 2.82 | 1.61 | 0.64 | 1.11 | 1.6  | 35.03 |
| Anthoathecata                 | 2.65 | 3.79 | 0.63 | 1.33 | 1.58 | 36.61 |
| <i>Muggiaea</i> sp. (Eudoxid) | 6.18 | 6.49 | 0.62 | 1.26 | 1.54 | 38.15 |
| <i>Euterpina acutifrons</i>   | 4.14 | 2.57 | 0.61 | 1.22 | 1.53 | 39.69 |
| Auricularia                   | 3.16 | 2.27 | 0.61 | 1.28 | 1.52 | 41.21 |
| <i>Paraeuchaeta hebes</i>     | 2.17 | 1.55 | 0.59 | 0.87 | 1.47 | 42.68 |
| <i>Evadne spinifera</i>       | 5.96 | 7.34 | 0.58 | 0.89 | 1.46 | 44.14 |
| <i>Corycaeus</i> sp.          | 1.02 | 2.48 | 0.56 | 1.16 | 1.39 | 45.53 |
| <i>Temora stylifera</i>       | 2.7  | 0    | 0.55 | 0.94 | 1.37 | 46.9  |
| <i>Centropages typicus</i>    | 6.39 | 5.7  | 0.54 | 1.01 | 1.36 | 48.26 |
| Anchovy larvae                | 3.13 | 3.5  | 0.54 | 1.4  | 1.34 | 49.6  |
| Actinotroch                   | 1.68 | 2.51 | 0.53 | 1.26 | 1.33 | 50.93 |

**Table S5.** Results of the marginal and the sequential test for the DistLM model, with an indication of the best model. AIC: Akaike information criterion, Prop.: proportion of variation explained by each variable, Cumul.: cumulative, SS(trace): portion of sum of squares relative to the analyzed predictor variable, No. vars: number of variables, Res. df: residual degrees of freedom, RSS: residual sum of squares.

| MARGINAL TESTS   |           |           |          |            |       |        |        |
|------------------|-----------|-----------|----------|------------|-------|--------|--------|
| Variable         | SS(trace) | Pseudo-F  | P        | Prop.      |       |        |        |
| Temperature (C°) | 2017      | 2.799     | 0.013    | 0.135      |       |        |        |
| Salinity (PSU)   | 3301.7    | 5.086     | <0.001   | 0.220      |       |        |        |
|                  |           |           |          |            |       |        |        |
| SEQUENTIAL TESTS |           |           |          |            |       |        |        |
| Variable         | AIC       | SS(trace) | Pseudo-F | P          | Prop. | Cumul. | res.df |
| Salinity (PSU)   | 131.41    | 3301.7    | 5.086    | <0.001     | 0.220 | 0.220  | 18     |
| Temperature (C°) | 130.22    | 1720.2    | 2.934    | 0.005      | 0.115 | 0.335  | 17     |
|                  |           |           |          |            |       |        |        |
| BEST SOLUTION    |           |           |          |            |       |        |        |
| AIC              | R²        | RSS       | No.Vars  | Selections |       |        |        |
| 130.22           | 0.335     | 9965.7    | 2        | 2;6        |       |        |        |

**Table S6.** Matrix of taxa identified during zooplankton sorting of 2019 samples, expressed as individuals per m<sup>2</sup>.

| Phylum     | Class        | Specie                         | 4_2019 | 14_2019 | 17_2019 | 22_2019 | 23_2019 | 30_2019 | 33_2019 | 38_2019 | 43_2019 | 48_2019 |
|------------|--------------|--------------------------------|--------|---------|---------|---------|---------|---------|---------|---------|---------|---------|
| Annelida   | Polychaeta   | Tomopteridae                   | 0      | 0       | 0       | 0       | 0       | 0       | 0       | 0       | 0       | 0       |
| Annelida   | Polychaeta   | Polychaeta                     | 784    | 170     | 699     | 306     | 945     | 180     | 603     | 55      | 125     | 102     |
| Annelida   | Polychaeta   | Trochophore                    | 0      | 0       | 0       | 0       | 0       | 0       | 0       | 0       | 0       | 0       |
| Arthropoda | Branchiopoda | <i>Penilia avirostris</i>      | 0      | 1113    | 1099    | 106     | 3307    | 4288    | 3922    | 8106    | 31      | 1819    |
| Arthropoda | Branchiopoda | <i>Evadne nordmanni</i>        | 592    | 341     | 507     | 98      | 9928    | 1987    | 0       | 71      | 0       | 0       |
| Arthropoda | Branchiopoda | <i>Evadne spinifera</i>        | 0      | 705     | 399     | 0       | 3779    | 12549   | 4072    | 498     | 1092    | 2529    |
| Arthropoda | Branchiopoda | <i>Pleopis polyphemoides</i>   | 3184   | 1719    | 11085   | 4436    | 10558   | 1882    | 0       | 7111    | 0       | 0       |
| Arthropoda | Branchiopoda | <i>Podon intermedius</i>       | 82     | 0       | 8       | 91      | 953     | 112     | 2413    | 0       | 289     | 44      |
| Arthropoda | Branchiopoda | <i>Pseudevadne tergestina</i>  | 0      | 8       | 0       | 0       | 0       | 0       | 0       | 284     | 0       | 133     |
| Arthropoda | Copepoda     | <i>Acartia</i> sp.             | 28361  | 34603   | 59721   | 7605    | 117945  | 17883   | 11463   | 2489    | 1092    | 8164    |
| Arthropoda | Copepoda     | <i>Aetideus armatus</i>        | 0      | 0       | 0       | 0       | 0       | 0       | 0       | 0       | 8       | 0       |
| Arthropoda | Copepoda     | <i>Calanus helgolandicus</i>   | 0      | 0       | 116     | 0       | 1590    | 1360    | 10137   | 0       | 1092    | 102     |
| Arthropoda | Copepoda     | <i>Mesocalanus tenuicornis</i> | 0      | 0       | 0       | 0       | 0       | 0       | 63      | 8       | 425     | 0       |
| Arthropoda | Copepoda     | <i>Nannocalanus minor</i>      | 0      | 0       | 0       | 0       | 0       | 0       | 619     | 0       | 433     | 0       |
| Arthropoda | Copepoda     | <i>Candacia giesbrechti</i>    | 0      | 0       | 0       | 0       | 0       | 0       | 0       | 0       | 16      | 0       |
| Arthropoda | Copepoda     | <i>Candacia varicans</i>       | 0      | 0       | 0       | 0       | 0       | 361     | 24      | 0       | 16      | 0       |
| Arthropoda | Copepoda     | <i>Centropages kroyeri</i>     | 0      | 0       | 0       | 0       | 315     | 0       | 0       | 0       | 0       | 185     |
| Arthropoda | Copepoda     | <i>Centropages ponticus</i>    | 1407   | 1370    | 200     | 94      | 0       | 732     | 0       | 142     | 0       | 0       |
| Arthropoda | Copepoda     | <i>Centropages typicus</i>     | 815    | 713     | 300     | 149     | 2685    | 1673    | 3342    | 213     | 690     | 97      |
| Arthropoda | Copepoda     | <i>Isias clavipes</i>          | 0      | 0       | 0       | 0       | 0       | 0       | 0       | 8       | 0       | 47      |
| Arthropoda | Copepoda     | <i>Diaixis pygmaea</i>         | 0      | 0       | 0       | 0       | 0       | 1046    | 0       | 8       | 410     | 0       |
| Arthropoda | Copepoda     | <i>Pareucalanus sewelli</i>    | 0      | 0       | 0       | 0       | 0       | 0       | 24      | 0       | 24      | 0       |
| Arthropoda | Copepoda     | <i>Paraeuchaeta hebes</i>      | 0      | 0       | 0       | 0       | 0       | 0       | 1381    | 8       | 3725    | 55      |
| Arthropoda | Copepoda     | <i>Calocalanus</i> sp.         | 0      | 0       | 0       | 0       | 1890    | 1464    | 619     | 71      | 417     | 52      |
| Arthropoda | Copepoda     | <i>Mecynocera clausi</i>       | 0      | 0       | 0       | 0       | 0       | 0       | 619     | 0       | 554     | 16      |
| Arthropoda | Copepoda     | <i>Pontella mediterranea</i>   | 0      | 0       | 0       | 8       | 0       | 0       | 0       | 0       | 0       | 0       |
| Arthropoda | Copepoda     | <i>Pseudodiaptomus marinus</i> | 0      | 0       | 0       | 0       | 0       | 8       | 0       | 8       | 0       | 1282    |
| Arthropoda | Copepoda     | <i>Temora longicornis</i>      | 0      | 0       | 507     | 71      | 8       | 426     | 0       | 8       | 8       | 0       |
| Arthropoda | Copepoda     | <i>Temora styliфера</i>        | 0      | 0       | 0       | 0       | 0       | 740     | 468     | 24      | 157     | 407     |
| Arthropoda | Copepoda     | Calanoida                      | 13551  | 25679   | 30759   | 3531    | 58894   | 21961   | 19306   | 7395    | 9283    | 4614    |
| Arthropoda | Copepoda     | Clauso-Paracalanidae           | 0      | 0       | 0       | 0       | 630     | 0       | 9050    | 8       | 11058   | 0       |
| Arthropoda | Copepoda     | <i>Corycaeus</i> sp.           | 0      | 0       | 0       | 0       | 0       | 0       | 167     | 0       | 160     | 0       |
| Arthropoda | Copepoda     | <i>Farranula rostrata</i>      | 0      | 0       | 0       | 0       | 0       | 0       | 2119    | 71      | 827     | 0       |

|              |              |                                  |      |      |       |      |       |       |       |       |       |      |
|--------------|--------------|----------------------------------|------|------|-------|------|-------|-------|-------|-------|-------|------|
| Arthropoda   | Copepoda     | <i>Oithona sp.</i>               | 8590 | 9468 | 30160 | 9416 | 95899 | 59296 | 27602 | 30150 | 23754 | 3106 |
| Arthropoda   | Copepoda     | <i>Oncaea sp.</i>                | 148  | 76   | 200   | 31   | 1260  | 1778  | 6486  | 142   | 3990  | 266  |
| Arthropoda   | Copepoda     | <i>Copilia mediterranea</i>      | 0    | 0    | 0     | 0    | 0     | 0     | 16    | 0     | 180   | 0    |
| Arthropoda   | Copepoda     | <i>Sapphirina nigromaculata</i>  | 0    | 0    | 0     | 0    | 0     | 0     | 8     | 0     | 0     | 0    |
| Arthropoda   | Copepoda     | <i>Microsetella rosea</i>        | 0    | 0    | 0     | 0    | 0     | 0     | 0     | 0     | 63    | 0    |
| Arthropoda   | Copepoda     | <i>Goniopsyllus clausi</i>       | 0    | 0    | 100   | 0    | 0     | 8     | 0     | 0     | 31    | 0    |
| Arthropoda   | Copepoda     | <i>Euterpina acutifrons</i>      | 296  | 144  | 0     | 78   | 323   | 531   | 151   | 71    | 0     | 141  |
| Arthropoda   | Copepoda     | Copepoda (nauplius)              | 1777 | 341  | 1798  | 125  | 3937  | 4601  | 151   | 356   | 137   | 452  |
| Arthropoda   | Malacostraca | <i>Lestrigonus schizogeneios</i> | 0    | 0    | 0     | 0    | 0     | 0     | 8     | 0     | 16    | 0    |
| Arthropoda   | Malacostraca | Alpheidae                        | 31   | 0    | 0     | 0    | 8     | 0     | 24    | 0     | 8     | 0    |
| Arthropoda   | Malacostraca | Callianassidae                   | 0    | 0    | 0     | 0    | 8     | 31    | 533   | 0     | 63    | 8    |
| Arthropoda   | Malacostraca | Crangonidae                      | 8    | 0    | 8     | 0    | 0     | 16    | 0     | 0     | 0     | 0    |
| Arthropoda   | Malacostraca | <i>Diogenes pugilator</i>        | 0    | 16   | 0     | 0    | 0     | 0     | 0     | 0     | 0     | 0    |
| Arthropoda   | Malacostraca | Dromiidae                        | 0    | 0    | 0     | 0    | 0     | 0     | 0     | 0     | 0     | 0    |
| Arthropoda   | Malacostraca | Galatheidae                      | 0    | 0    | 0     | 0    | 0     | 0     | 0     | 0     | 0     | 0    |
| Arthropoda   | Malacostraca | Hippolytidae                     | 0    | 0    | 16    | 0    | 0     | 0     | 0     | 8     | 0     | 0    |
| Arthropoda   | Malacostraca | <i>Jaxea nocturna</i>            | 0    | 0    | 8     | 0    | 8     | 0     | 0     | 8     | 0     | 0    |
| Arthropoda   | Malacostraca | Paguridae                        | 24   | 0    | 8     | 0    | 0     | 0     | 0     | 8     | 0     | 0    |
| Arthropoda   | Malacostraca | Palaemonidae                     | 0    | 8    | 0     | 0    | 0     | 0     | 0     | 0     | 0     | 0    |
| Arthropoda   | Malacostraca | <i>Palinurus elephas</i>         | 0    | 0    | 0     | 0    | 0     | 0     | 8     | 0     | 0     | 0    |
| Arthropoda   | Malacostraca | Penaeidae (nauplius)             | 0    | 0    | 0     | 8    | 0     | 217   | 0     | 0     | 0     | 91   |
| Arthropoda   | Malacostraca | Porcellanidae                    | 47   | 8    | 0     | 0    | 0     | 0     | 0     | 0     | 0     | 0    |
| Arthropoda   | Malacostraca | Processidae                      | 86   | 71   | 78    | 16   | 86    | 55    | 165   | 71    | 31    | 31   |
| Arthropoda   | Malacostraca | <i>Solenocera sp.</i>            | 0    | 0    | 0     | 0    | 0     | 0     | 24    | 0     | 39    | 16   |
| Arthropoda   | Malacostraca | Upogebiidae                      | 8    | 39   | 8     | 31   | 0     | 0     | 24    | 8     | 16    | 157  |
| Arthropoda   | Malacostraca | Brachyura (megalopa)             | 0    | 0    | 0     | 0    | 0     | 0     | 0     | 0     | 0     | 0    |
| Arthropoda   | Malacostraca | Brachyura (zoea)                 | 141  | 8    | 24    | 16   | 16    | 31    | 204   | 55    | 8     | 227  |
| Arthropoda   | Malacostraca | <i>Hansarsia megalops</i>        | 0    | 0    | 0     | 0    | 0     | 0     | 0     | 0     | 8     | 0    |
| Arthropoda   | Malacostraca | <i>Meganctiphanes norvegica</i>  | 0    | 0    | 0     | 0    | 0     | 0     | 0     | 0     | 55    | 0    |
| Arthropoda   | Malacostraca | Isopoda                          | 0    | 0    | 0     | 0    | 0     | 0     | 8     | 0     | 0     | 0    |
| Arthropoda   | Malacostraca | <i>Erythrops elegans</i>         | 0    | 0    | 8     | 0    | 0     | 0     | 0     | 0     | 0     | 0    |
| Arthropoda   | Malacostraca | <i>Leptomysis lingvura</i>       | 0    | 0    | 47    | 0    | 0     | 0     | 0     | 16    | 8     | 0    |
| Arthropoda   | Malacostraca | <i>Leptomysis mediterranea</i>   | 0    | 0    | 0     | 0    | 0     | 0     | 0     | 0     | 0     | 0    |
| Arthropoda   | Malacostraca | Stomatopoda                      | 0    | 0    | 0     | 0    | 0     | 0     | 0     | 0     | 8     | 0    |
| Arthropoda   | Ostracoda    | Ostracoda                        | 0    | 0    | 0     | 8    | 0     | 8     | 24    | 8     | 47    | 0    |
| Arthropoda   | Thecostraca  | Cirripedia (cypris)              | 0    | 0    | 0     | 0    | 157   | 0     | 0     | 0     | 137   | 44   |
| Arthropoda   | Thecostraca  | Cirripedia (nauplius)            | 740  | 204  | 8     | 114  | 0     | 105   | 0     | 0     | 0     | 112  |
| Chaetognatha |              | Chaetognatha                     | 0    | 0    | 47    | 24   | 472   | 188   | 1659  | 16    | 1757  | 157  |



|               |                |                                      |      |      |      |      |       |       |       |     |       |      |
|---------------|----------------|--------------------------------------|------|------|------|------|-------|-------|-------|-----|-------|------|
| Chordata      | Appendicularia | <i>Fritillaria pellucida</i>         | 0    | 0    | 0    | 0    | 0     | 16    | 0     | 0   | 137   | 0    |
| Chordata      | Appendicularia | <i>Oikopleura sp.</i>                | 7627 | 2520 | 7091 | 1630 | 14645 | 10249 | 9955  | 996 | 4505  | 621  |
| Chordata      | Leptocardii    | <i>Branchiostoma lanceolatum</i>     | 0    | 0    | 8    | 0    | 8     | 0     | 0     | 0   | 0     | 0    |
| Chordata      | Teleostei      | Anchovy eggs                         | 8    | 0    | 39   | 8    | 149   | 941   | 165   | 39  | 141   | 16   |
| Chordata      | Teleostei      | Anchovy larvae                       | 8    | 24   | 0    | 0    | 541   | 463   | 220   | 0   | 133   | 24   |
| Chordata      | Teleostei      | Fish eggs                            | 55   | 39   | 63   | 31   | 55    | 39    | 133   | 0   | 16    | 31   |
| Chordata      | Teleostei      | Fish larvae                          | 16   | 8    | 8    | 8    | 31    | 31    | 86    | 24  | 39    | 71   |
| Chordata      | Thaliacea      | <i>Doliolina muelleri</i>            | 0    | 31   | 108  | 0    | 6480  | 15906 | 30166 | 529 | 72490 | 3004 |
| Chordata      | Thaliacea      | <i>Doliolum nationalis</i>           | 0    | 0    | 0    | 0    | 0     | 8     | 0     | 0   | 0     | 0    |
| Chordata      | Thaliacea      | <i>Salpa fusiformis</i>              | 0    | 0    | 0    | 0    | 0     | 0     | 0     | 0   | 8     | 0    |
| Chordata      | Thaliacea      | <i>Thalia democratica</i>            | 0    | 0    | 0    | 0    | 0     | 0     | 0     | 0   | 0     | 0    |
| Cnidaria      | Hydrozoa       | Anthoathecata                        | 1851 | 251  | 16   | 149  | 0     | 31    | 0     | 8   | 0     | 0    |
| Cnidaria      | Hydrozoa       | <i>Clytia sp.</i>                    | 0    | 0    | 0    | 0    | 0     | 0     | 0     | 0   | 8     | 0    |
| Cnidaria      | Hydrozoa       | <i>Obelia sp.</i>                    | 0    | 0    | 0    | 0    | 0     | 8     | 0     | 0   | 8     | 0    |
| Cnidaria      | Hydrozoa       | <i>Eucheilota paradoxa</i>           | 0    | 0    | 0    | 0    | 0     | 8     | 0     | 0   | 0     | 0    |
| Cnidaria      | Hydrozoa       | Leptothecata                         | 0    | 0    | 0    | 0    | 0     | 0     | 0     | 0   | 0     | 0    |
| Cnidaria      | Hydrozoa       | <i>Liriope tetraphylla</i>           | 0    | 0    | 0    | 0    | 0     | 0     | 39    | 0   | 31    | 0    |
| Cnidaria      | Hydrozoa       | <i>Nanomia bijuga</i>                | 0    | 0    | 0    | 0    | 0     | 0     | 8     | 0   | 125   | 0    |
| Cnidaria      | Hydrozoa       | <i>Eudoxoides spiralis</i>           | 0    | 0    | 0    | 0    | 0     | 0     | 0     | 0   | 47    | 0    |
| Cnidaria      | Hydrozoa       | <i>Eudoxoides spiralis</i> (eudoxid) | 0    | 0    | 0    | 0    | 0     | 0     | 0     | 0   | 165   | 0    |
| Cnidaria      | Hydrozoa       | <i>Lensia subtilis</i>               | 0    | 0    | 0    | 0    | 0     | 0     | 16    | 0   | 184   | 0    |
| Cnidaria      | Hydrozoa       | <i>Muggiaea atlantica</i>            | 8    | 0    | 16   | 0    | 2055  | 1778  | 31    | 31  | 251   | 0    |
| Cnidaria      | Hydrozoa       | <i>Muggiaea kochii</i>               | 31   | 8    | 102  | 8    | 795   | 2003  | 603   | 71  | 220   | 24   |
| Cnidaria      | Hydrozoa       | <i>Muggiaea sp.</i> (Eudoxid)        | 222  | 8    | 300  | 8    | 4882  | 11713 | 5430  | 798 | 2048  | 266  |
| Cnidaria      | Hydrozoa       | <i>Sphaeronectes keollikeri</i>      | 0    | 0    | 0    | 0    | 8     | 0     | 31    | 0   | 414   | 0    |
| Cnidaria      | Hydrozoa       | <i>Aglaura hemistoma</i>             | 0    | 0    | 0    | 0    | 0     | 0     | 24    | 0   | 31    | 0    |
| Cnidaria      | Hydrozoa       | <i>Rhopalonema velatum</i>           | 0    | 0    | 0    | 0    | 0     | 0     | 0     | 0   | 16    | 0    |
| Cnidaria      | Scyphozoa      | Ephyrae                              | 0    | 8    | 0    | 0    | 0     | 0     | 0     | 0   | 0     | 0    |
| Ctenophora    | Tentaculata    | <i>Mnemiopsis leidyi</i>             | 0    | 0    | 0    | 0    | 0     | 0     | 0     | 0   | 0     | 0    |
| Echinodermata | Asteroidea     | Bipinnaria                           | 0    | 0    | 0    | 0    | 0     | 16    | 0     | 16  | 0     | 0    |
| Echinodermata | Asteroidea     | Brachiolaria                         | 0    | 0    | 0    | 0    | 8     | 0     | 0     | 0   | 8     | 0    |
| Echinodermata | Echinoidea     | Echinopluteus                        | 74   | 31   | 0    | 141  | 0     | 0     | 8     | 0   | 8     | 0    |
| Echinodermata | Holothuroidea  | Auricularia                          | 82   | 92   | 100  | 439  | 157   | 105   | 0     | 0   | 8     | 0    |
| Echinodermata | Holothuroidea  | Doliolaria Holothuroidea             | 0    | 0    | 39   | 8    | 0     | 0     | 0     | 0   | 0     | 0    |
| Echinodermata | Ophiuroidea    | Ophiopluteus                         | 1481 | 1703 | 2297 | 913  | 2527  | 2196  | 611   | 356 | 110   | 0    |
| Hemichordata  | Enteropneusta  | Tornaria                             | 0    | 31   | 123  | 8    | 39    | 71    | 8     | 0   | 39    | 0    |
| Cnidaria      | Hydrozoa       | Actinula                             | 0    | 0    | 0    | 8    | 0     | 0     | 0     | 0   | 0     | 0    |
| Mollusca      | Bivalvia       | Bivalvia larvae                      | 1037 | 1703 | 100  | 157  | 315   | 1569  | 3318  | 284 | 2184  | 311  |

|                 |             |                              |       |        |       |        |        |        |      |       |      |     |
|-----------------|-------------|------------------------------|-------|--------|-------|--------|--------|--------|------|-------|------|-----|
| Mollusca        | Gastropoda  | Pilidium                     | 0     | 8      | 100   | 8      | 0      | 8      | 0    | 0     | 0    | 0   |
| Mollusca        | Gastropoda  | <i>Creseis acicula</i>       | 0     | 0      | 0     | 0      | 0      | 8      | 376  | 8     | 2056 | 16  |
| Mollusca        | Gastropoda  | Gastropoda larvae            | 4813  | 954    | 599   | 376    | 630    | 1367   | 2715 | 1422  | 827  | 44  |
| Phoronida       |             | Actinotroch                  | 0     | 24     | 8     | 31     | 0      | 0      | 0    | 87    | 31   | 0   |
| Platyhelminthes | Polycladida | Mueller's larva              | 0     | 0      | 8     | 0      | 0      | 8      | 0    | 0     | 0    | 0   |
| Myxozoa         | Dynophyceae | <i>Noctiluca scintillans</i> | 30508 | 187937 | 60121 | 983592 | 559405 | 148059 | 0    | 41599 | 44   | 956 |

**Table S7.** Matrix of taxa identified during zooplankton sorting of 2022 samples, expressed as individuals per m<sup>2</sup>.

| Phylum     | Class        | Specie                         | 4_2022 | 14_2022 | 17_2022 | 22_2022 | 23_2022 | 30_2022 | 33_2022 | 38_2022 | 43_2022 | 48_2022 |
|------------|--------------|--------------------------------|--------|---------|---------|---------|---------|---------|---------|---------|---------|---------|
| Annelida   | Polychaeta   | Tomopteridae                   | 0      | 0       | 0       | 0       | 0       | 8       | 16      | 0       | 55      | 0       |
| Annelida   | Polychaeta   | Polychaeta                     | 656    | 937     | 652     | 628     | 398     | 392     | 24      | 55      | 133     | 24      |
| Annelida   | Polychaeta   | Trochophore                    | 8      | 0       | 0       | 0       | 0       | 0       | 0       | 0       | 0       | 0       |
| Arthropoda | Branchiopoda | <i>Penilia avirostris</i>      | 331    | 1204    | 54160   | 57927   | 20432   | 280     | 0       | 64352   | 316     | 2633    |
| Arthropoda | Branchiopoda | <i>Evadne nordmanni</i>        | 0      | 0       | 0       | 0       | 0       | 0       | 0       | 0       | 0       | 0       |
| Arthropoda | Branchiopoda | <i>Evadne spinifera</i>        | 828    | 3278    | 11484   | 550     | 1102    | 1120    | 177     | 2154    | 8842    | 1022    |
| Arthropoda | Branchiopoda | <i>Pleopis polyphemoides</i>   | 414    | 736     | 567     | 558     | 0       | 798     | 0       | 0       | 0       | 0       |
| Arthropoda | Branchiopoda | <i>Podon intermedius</i>       | 0      | 0       | 0       | 0       | 81      | 42      | 265     | 0       | 204     | 0       |
| Arthropoda | Branchiopoda | <i>Pseudevadne tergestina</i>  | 1159   | 803     | 709     | 1808    | 0       | 0       | 0       | 0       | 0       | 182     |
| Arthropoda | Copepoda     | <i>Acartia sp.</i>             | 11923  | 10035   | 77978   | 31125   | 9261    | 4898    | 1327    | 2090    | 947     | 795     |
| Arthropoda | Copepoda     | <i>Aetideus armatus</i>        | 0      | 0       | 0       | 0       | 0       | 0       | 0       | 0       | 0       | 0       |
| Arthropoda | Copepoda     | <i>Calanus helgolandicus</i>   | 0      | 0       | 393     | 0       | 3722    | 2854    | 5540    | 149     | 9845    | 31      |
| Arthropoda | Copepoda     | <i>Mesocalanus tenuicornis</i> | 0      | 0       | 0       | 0       | 0       | 0       | 466     | 0       | 4594    | 31      |
| Arthropoda | Copepoda     | <i>Nannocalanus minor</i>      | 0      | 0       | 0       | 0       | 0       | 0       | 289     | 0       | 663     | 0       |
| Arthropoda | Copepoda     | <i>Candacia giesbrechti</i>    | 0      | 0       | 0       | 0       | 0       | 0       | 0       | 0       | 8       | 0       |
| Arthropoda | Copepoda     | <i>Candacia varicans</i>       | 0      | 0       | 0       | 0       | 0       | 8       | 0       | 0       | 31      | 0       |
| Arthropoda | Copepoda     | <i>Centropages kroyeri</i>     | 0      | 0       | 0       | 0       | 0       | 140     | 0       | 0       | 0       | 388     |
| Arthropoda | Copepoda     | <i>Centropages ponticus</i>    | 4968   | 4231    | 859     | 3230    | 0       | 140     | 0       | 0       | 0       | 772     |
| Arthropoda | Copepoda     | <i>Centropages typicus</i>     | 0      | 350     | 1008    | 5918    | 1984    | 3514    | 1069    | 221     | 1595    | 0       |
| Arthropoda | Copepoda     | <i>Isias clavipes</i>          | 0      | 0       | 8       | 0       | 0       | 0       | 0       | 0       | 0       | 0       |
| Arthropoda | Copepoda     | <i>Diaixis pygmaea</i>         | 0      | 0       | 0       | 0       | 0       | 0       | 0       | 0       | 0       | 0       |
| Arthropoda | Copepoda     | <i>Pareucalanus sewelli</i>    | 0      | 0       | 0       | 0       | 0       | 0       | 0       | 0       | 0       | 0       |
| Arthropoda | Copepoda     | <i>Paraeuchaeta hebes</i>      | 0      | 0       | 0       | 0       | 0       | 0       | 1751    | 0       | 2960    | 0       |
| Arthropoda | Copepoda     | <i>Calocalanus sp.</i>         | 0      | 0       | 0       | 0       | 0       | 0       | 8       | 0       | 947     | 0       |
| Arthropoda | Copepoda     | <i>Mecynocera clausi</i>       | 0      | 0       | 0       | 0       | 0       | 0       | 0       | 0       | 8       | 0       |
| Arthropoda | Copepoda     | <i>Pontella mediterranea</i>   | 0      | 0       | 0       | 0       | 0       | 0       | 0       | 0       | 0       | 0       |
| Arthropoda | Copepoda     | <i>Pseudodiaptomus marinus</i> | 0      | 0       | 0       | 0       | 0       | 8       | 0       | 0       | 0       | 0       |

[illegible]

[illegible]

[illegible]
